# Supplementary material
Source: PubMed Central journal article supplement (PMC4557740)

Figure S1

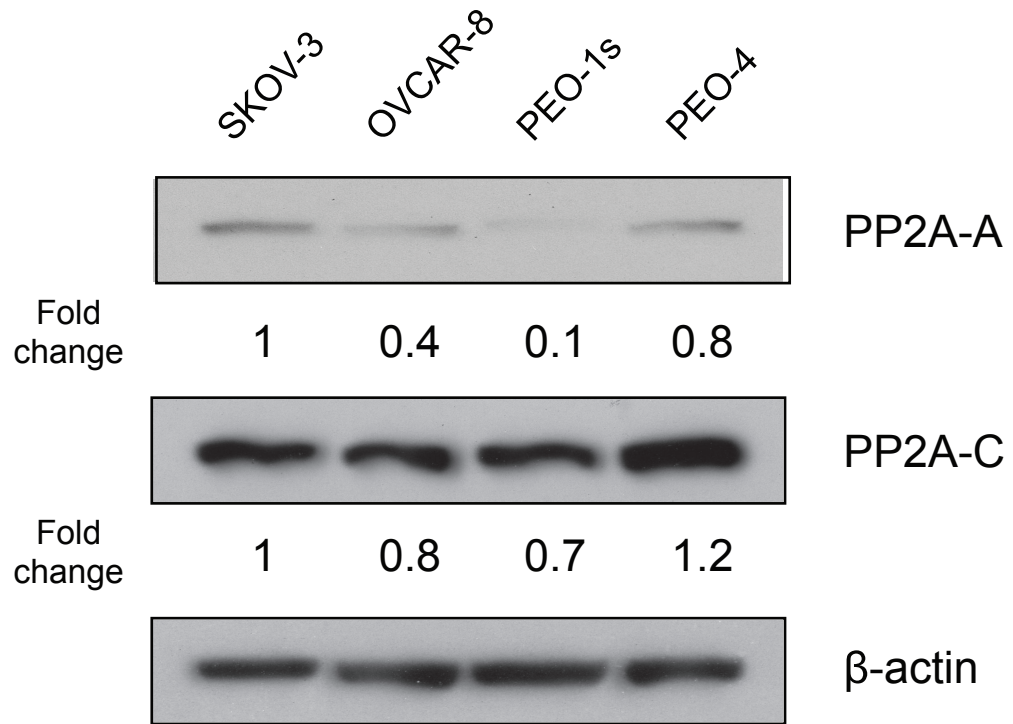

Figure S2

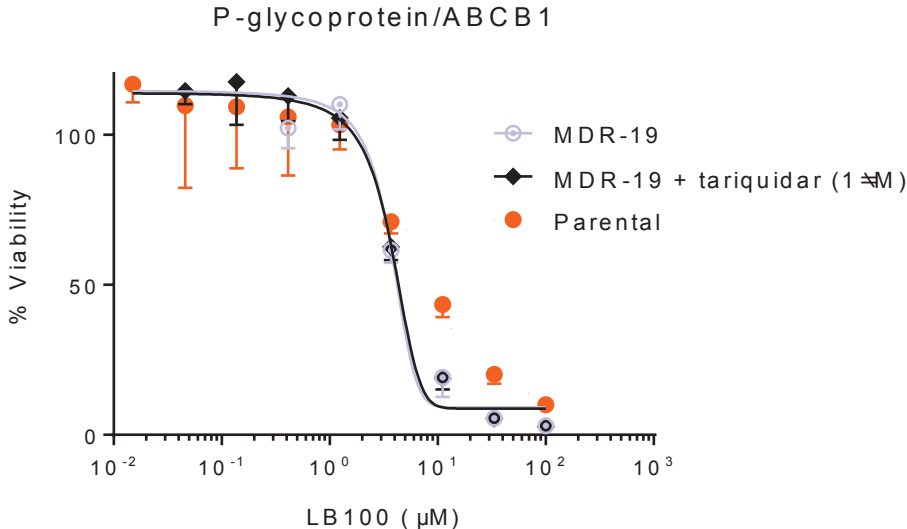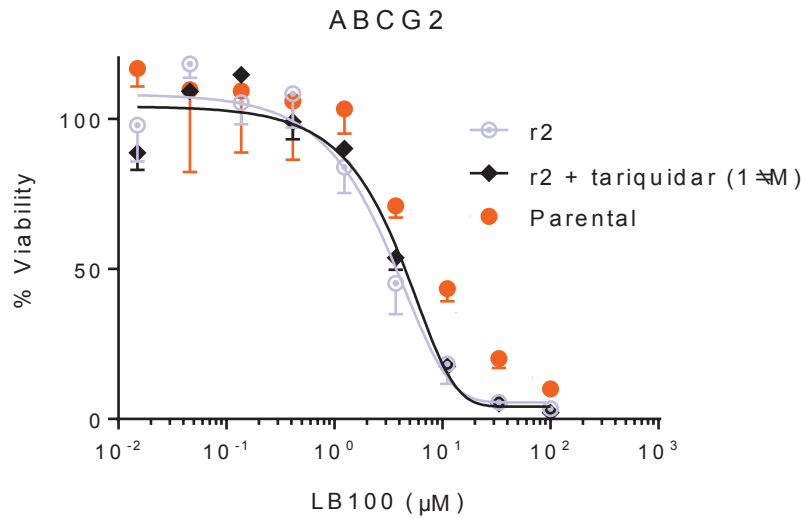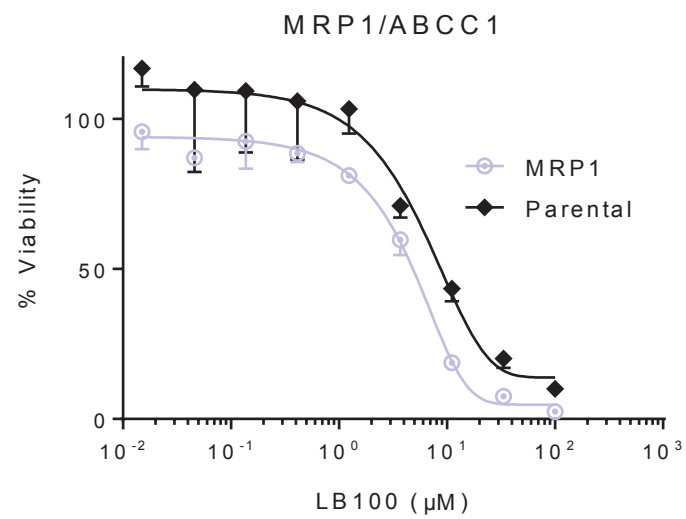

Figure S3

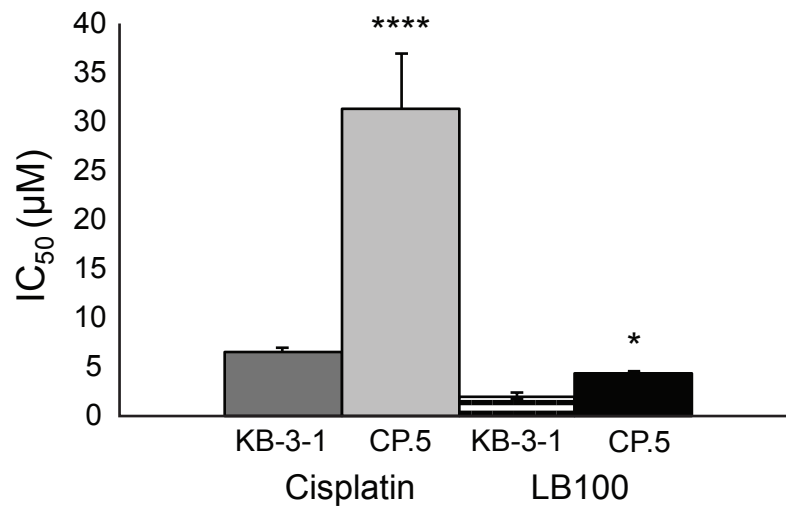

---

|         | <u>LB100 (µM)</u> | <u>Cisplatin (µM)</u> |
|---------|-------------------|-----------------------|
| KB-3-1  | 2.0 ± 0.4         | 6.6 ± 0.2             |
| KB-CP.5 | 4.4 ± 0.3         | 31.8 ± 5.7            |

---

Figure S4

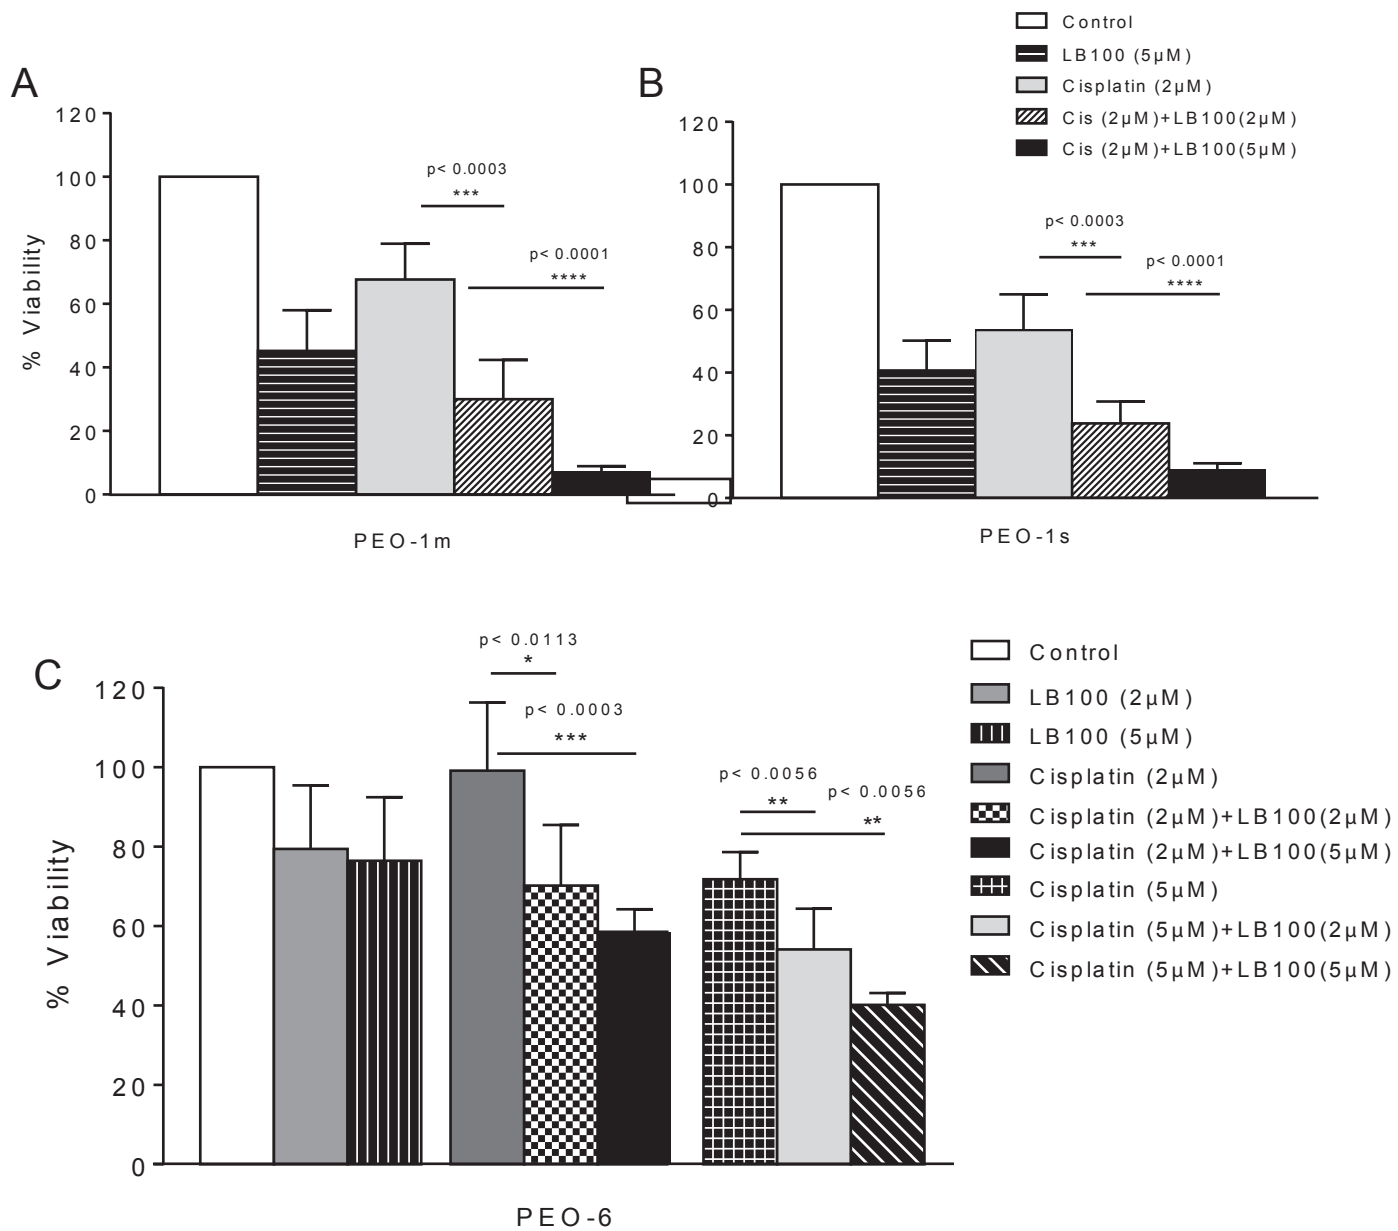

Figure S5

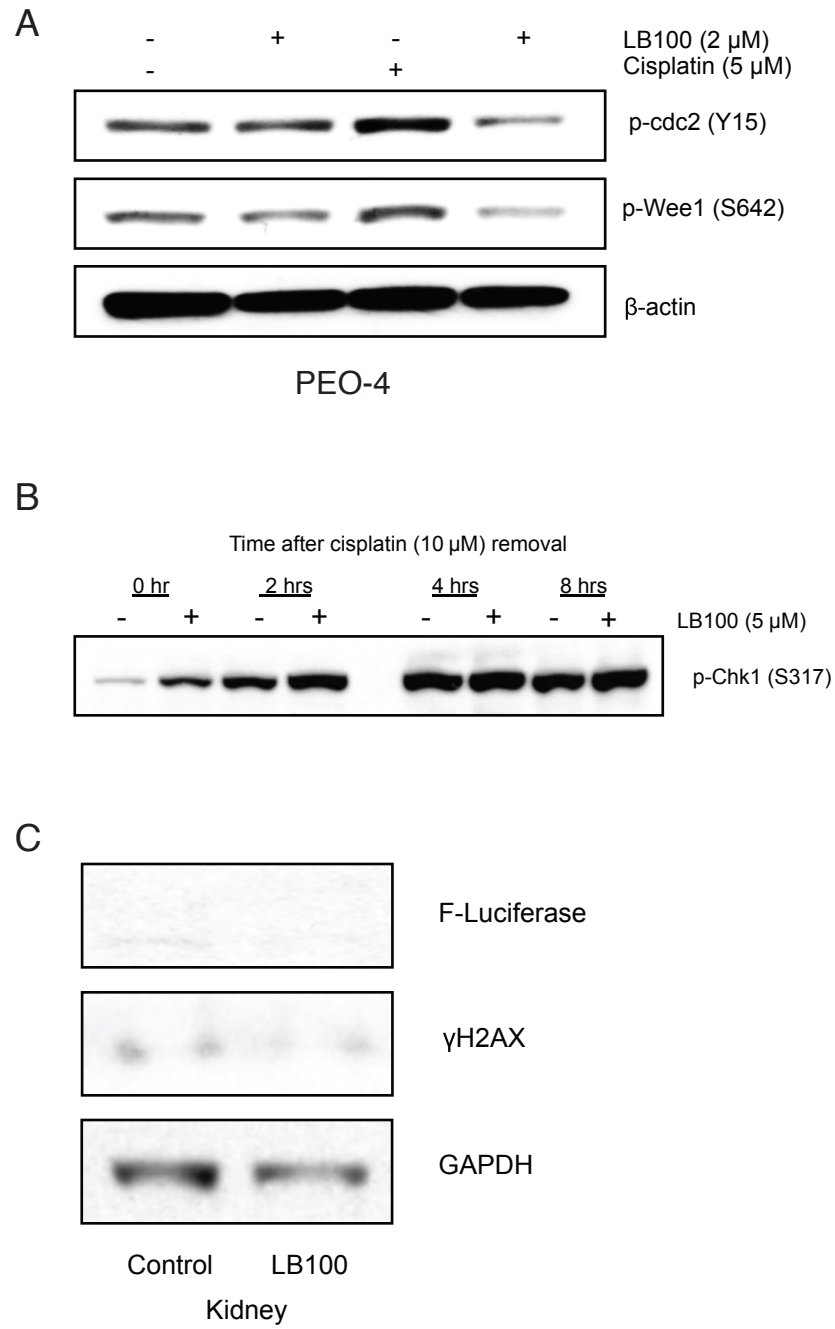

Supplement: NIHMS718778-supplement-Figs_S1-S5.pdf [file NIHMS718778-supplement-Figs_S1-S5.pdf]
